# Supplementary material for: Unusual temperature dependence of the fluorescence decay in heterostructured stilbene
Source: Royal Society of Chemistry journal article supplement (doi:10.1039/d0cp05436d), 2021-01-01
Supplement: d0cp05436d1.pdf [file d0cp05436d1.pdf]

## Unusual Temperature Dependence of the Fluorescence Decay in Heterostructured Stilbene

R. Karpicz<sup>a</sup>, N. Ostapenko<sup>b</sup>, Yu. Ostapenko<sup>b</sup>, Ya Polupan<sup>c</sup>, I. Lazarev<sup>c</sup>, N. Galunov<sup>c,d</sup>, M. Macernis<sup>e</sup>, D. Abramavicius<sup>e</sup>, L. Valkunas<sup>\*a,e</sup>

- a) Molecular Compounds Physics Department, Center for Physical Sciences and Technology, Sauletekio Ave. 3, LT-10257, Vilnius, Lithuania
- b) Institute of Physics, National Academy of Sciences of Ukraine, Nauki Ave. 46, 03028, Kiev, Ukraine
- c) Institute for Scintillation Materials of the NASU, Nauki Ave. 60, Kharkiv, 61022, Ukraine
- d) V. N. Karasin Kharkiv National University, Svobody Sq. 4, Kharkiv, 61022, Ukraine
- e) Institute of Chemical Physics, Faculty of Physics, Vilnius University, Saulėtekio Ave. 3, LT10222, Vilnius, Lithuania

### SUPPLEMENT

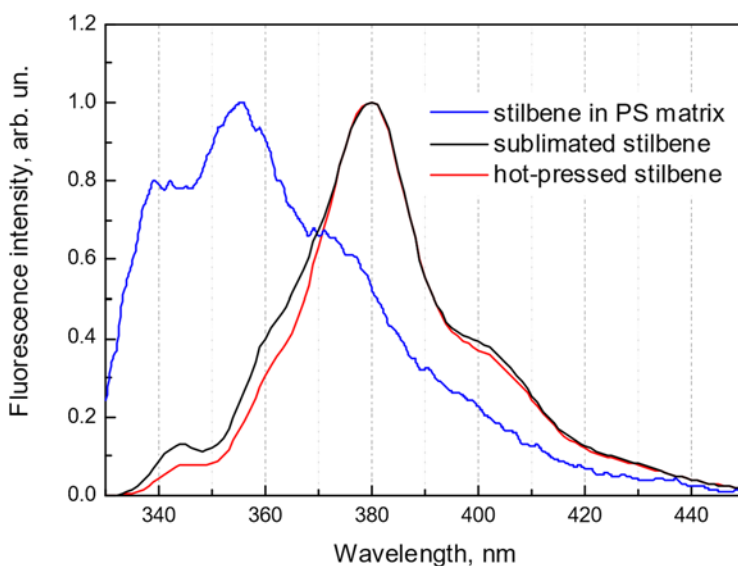

**Figure S1.** Normalized fluorescence ( $\lambda_{\text{ex}}=300$  nm) spectra of stilbene in PS matrix (blue line), of sublimated stilbene (black line) and of hot-pressed stilbene (red line) at 300K.

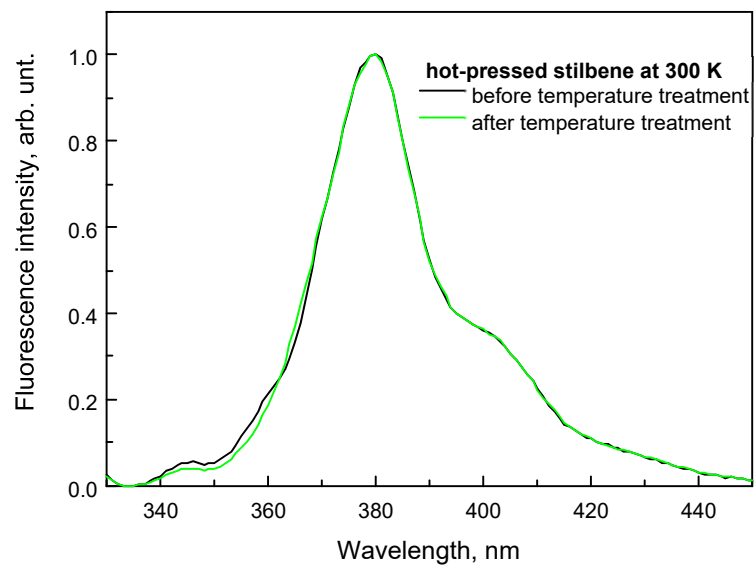

**Figure S2.** Normalized fluorescence ( $\lambda_{\text{ex}}=300$  nm) spectra of hot-pressed stilbene before temperature treatment (black line) and after low temperature treatment (green line) at 300K.
